# Supplementary material
Source: ML conference proceedings conference paper supplement (https://proceedings.neurips.cc/paper_files/paper/2022/hash/096347b4efc264ae7f07742fea34af1f-Abstract.html)
Supplement: Supplementary file 1 [file 096347b4efc264ae7f07742fea34af1f-Supplemental-Conference.zip]

Archive with 2 entries (2 files):
- _NIPS_22__Towards_Efficient_Post_training_Quantization_of_Pre_trained_Language_Models supp.pdf
- __MACOSX/.__NIPS_22__Towards_Efficient_Post_training_Quantization_of_Pre_trained_Language_Models supp.pdf
